## Reciprocal regulation between sirtuin-1 and angiotensin-II in the substantia nigra: implications for aging and neurodegeneration

Carmen Diaz-Ruiz<sup>1,2</sup>, Ana I. Rodriguez-Perez<sup>1,2</sup>, Daniel Beiroa<sup>3,4</sup>, Jannette Rodriguez-Pallares<sup>1,2</sup> and Jose L. Labandeira-Garcia<sup>1,2</sup>

<sup>1</sup> Laboratory of Neuroanatomy and Experimental Neurology, Dept. of Morphological Sciences, CIMUS, University of Santiago de Compostela, Santiago de Compostela, Spain.

<sup>2</sup> Networking Research Center on Neurodegenerative Diseases (CIBERNED), Madrid, Spain

<sup>3</sup> Department of Physiology, CIMUS, University of Santiago de Compostela, Santiago de Compostela, Spain.

<sup>4</sup> CIBER Fisiopatología de la Obesidad y Nutrición (CIBERObn), Spain

**Correspondence to:** Jose L. Labandeira-Garcia, **email:** joseluis.labandeira@usc.es

**Keywords:** dopamine, longevity, neuroinflammation, parkinson, resveratrol, Gerotarget

**Received:** July 31, 2015

**Accepted:** August 22, 2015

**Published:** September 10, 2015

This is an open-access article distributed under the terms of the Creative Commons Attribution License, which permits unrestricted use, distribution, and reproduction in any medium, provided the original author and source are credited.

### ABSTRACT

**Local angiotensin II (AII) and sirtuin 1 (SIRT1) play a major role in the modulation of neuroinflammation, oxidative stress and aging-related dopaminergic vulnerability to damage. However, it is not known whether the modulation is related to reciprocal regulation between SIRT1 and AII. In the present study, a single intraventricular injection of AII increased nigral SIRT1 levels in young adult rats. Although AII activity is known to be increased in aged rats, levels of SIRT1 were significantly lower than in young controls. Treatment with the SIRT1-activating compound resveratrol increased nigral SIRT1 levels in aged rats. Levels of SIRT1 were significantly higher in aged wild type mice than in AII type-1 receptor (AT1) deficient mice. In cell culture studies, treatment with AII also induced a transitory increase in levels of SIRT1 in the MES 23.5 dopaminergic neuron and the N9 microglial cell lines. In aged rats, treatment with resveratrol induced a significant decrease in the expression of AT1 receptors and markers of NADPH-oxidase activation (p47<sup>phox</sup>). In aged transgenic mice over-expressing SIRT1, levels of AT1 and p47<sup>phox</sup> were lower than in aged wild type controls. In vitro, the inhibitory effects of resveratrol on AII/AT1/NADPH-oxidase activity were confirmed in primary mesencephalic cultures, the N9 microglial cell line, and the dopaminergic neuron cell line MES 23.5, and they were blocked by the SIRT1 specific inhibitor EX527. The present findings show that SIRT1 and the axis AII/AT1/NADPH-oxidase regulate each other. This is impaired in aged animals and may be mitigated with sirtuin-activating compounds.**

### INTRODUCTION

The sirtuins are a highly conserved family of enzymes that regulate lifespan in lower organisms. The sirtuins act as NAD<sup>+</sup>-dependent protein deacetylases on a variety of targets, including histones, transcription factors and apoptotic modulators [1-4]. In mammals, the sirtuin family has seven members of (SIRT1-SIRT7). SIRT1 is present in the nucleus and cytoplasm and deacetylates several proteins involved in cell survival, metabolism and stress response, and it has been found to stimulate resistance to oxidative stress in several

types of cells [5, 6]. SIRT1 and pharmacological SIRT1 activators such as resveratrol (RV) have been suggested to counteract the effects of aging [7-9]. Advancing age itself is the most significant risk factor for the development of neurodegenerative diseases such as Parkinson's disease (PD) [10, 11]. However, the effects of SIRT1 on brain senescence and the development of neurodegenerative diseases are not clear [12-14]. SIRT1-activating compounds such as resveratrol and quercetin exert neuroprotective effects on dopaminergic neurons in PD models [15, 16]. Initially, it was not clear whether the antioxidant or sirtuin-activating effect (or both) was

responsible for the effects of resveratrol [15]. However, more recent studies have shown that the effect of SIRT1 on the microglial neuroinflammatory response plays a major role in the protective effects of resveratrol [16-18].

Angiotensin II (AII) is the most important effector peptide of the renin-angiotensin system (RAS), and its effects are mediated by two main cell receptors: AII type 1 and 2 (AT1 and AT2) receptors. AT2 receptors exert actions that are directly opposed to those mediated by AT1 receptors [19-20]. Hyperactivation of local or tissue RAS, via AT1 receptors and NADPH oxidase activation, mediates oxidative stress and several key events in inflammatory processes that play a major role in various aging-related diseases [21, 22]. Furthermore, local RAS has been associated with decreased longevity and age-related degenerative changes in a number of tissues [23-25]. In recent studies, we have demonstrated the presence of local RAS in the substantia nigra and striatum of rodents and primates [26-28], including humans [29]. We have also demonstrated that overactivation of local RAS, via AT1 receptors, exacerbates neuroinflammation, oxidative stress and dopaminergic cell death, all of which were inhibited by treatment with AT1 receptor antagonists [26, 30-32]. We have observed RAS overactivation in the nigrostriatal system of aged rats, along with enhanced levels of neuroinflammation and oxidative stress markers, leading to increased dopaminergic cell vulnerability to neurotoxins [33, 34], and possibly PD in humans [35-37].

The local RAS and SIRT1 both appear to play major roles in the modulation of neuroinflammation, oxidative stress and aging-related dopaminergic vulnerability to damage. However, it is not known whether SIRT1 and AII regulate each other in the modulatory process; manipulation of this reciprocal regulation may be useful for the development of neuroprotective treatments. In the present study, we used *in vivo* models (young and aged rats, and young and aged knockout and transgenic mice) and *in vitro* models (primary mesencephalic cultures and dopaminergic and microglial cell lines) to investigate a possible reciprocal regulation between SIRT1 and AII in the dopaminergic system.

## RESULTS

### Location of SIRT1 in dopaminergic neurons and glial cells in the rat substantia nigra, primary cultures and cell lines

Immunohistochemical analysis clearly showed SIRT1 expression in the nucleus and cytoplasm of dopaminergic neurons and microglial cells in the substantia nigra of control rats (Figure 1A, 1B). However, SIRT1 immunolabelling was not clearly distinguished in astrocytes in the substantia nigra of normal rats (Figure 1C,

1I). SIRT1 immunolabelling was observed in the nucleus and cytoplasm of dopaminergic neurons, microglia and astrocytes in primary cultures (Figure 1D-1F), suggesting that SIRT1 is upregulated in astrocytes under the *in vitro* conditions used. SIRT1 immunolabelling was also observed in the neuronal cell line MES 23.5 (Figure 1G) and the N9 microglial cell line (Figure 1H, 1J).

### Effect of RAS overactivity on SIRT1 expression

In the nigral region of young adult rats that received a single intraventricular injection of AII, increased levels of SIRT1 protein were observed 16 h after the injection. However, no significant increase in SIRT1 protein levels was observed in young adult rats that received daily intraventricular injection of AII for 7 days (Figure 2A).

Activation of the AII/AT1 pathway is known to be enhanced in the substantia nigra of aged rats; see [33] for details. However, levels of SIRT1 in aged rats were significantly lower than in young controls. Interestingly, treatment with resveratrol significantly increased the levels of SIRT1 in the nigral region of aged rats (Figure 2B). We also compared SIRT1 levels in the nigral region of aged AT1 KO mice (18 months old) and wild type mice of the same age. Levels of SIRT1 were significantly higher in aged wild type mice than in AT1 KO mice (Figure 2C). However, no significant differences were observed between young wild type controls and young AT1 KO mice (Figure 2C).

Treatment of the MES 23.5 dopaminergic neuron cell line and the N9 microglial cell line with AII induced an increase in levels of SIRT1 4 h after treatment, but no significant increase was observed 16 h after treatment with AII. AII-induced increase in SIRT1 levels in dopaminergic cells and microglial cells was inhibited by treatment with the AT1 antagonist ZD 7155 (Figure 3).

### Effect of SIRT1 activation on RAS activity

As indicated above, AII/AT1/NADPH-oxidase activity in the nigral region is higher in aged rats than in young rats; see [33] for details. As expected, levels of SIRT1 were increased significantly by treatment with resveratrol (Figure 2B). Therefore, in a second series of experiments, we investigated the effects of resveratrol on RAS activity in aged rats. Treatment with resveratrol induced a significant decrease in the expression of AT1 receptors, with no changes in AT2 receptor expression (i.e. a reduction in the AT1 to AT2 ratio), as well as a significant decrease in markers of NADPH-oxidase activation (i.e. p47<sup>phox</sup> subunit expression) (Figure 4A). In young transgenic mice over-expressing SIRT1, we observed a significant decrease in levels of the NADPH-oxidase subunit p47<sup>phox</sup>, which reflected decreased levels of NADPH-oxidase activation. However, we did not detect

any significant decrease in levels of AT1 receptors and AT2 receptors in young transgenic mice relative to young wild type mice (Figure 4B). In aged transgenic mice over-expressing SIRT1, we observed significant decrease in p47<sup>phox</sup> and AT1 expression relative to aged WT mice (Figure 4C).

We performed *in vitro* studies to identify the types of cells involved in the above-mentioned effects. WB studies in primary mesencephalic cultures (Figure 5A-5C), the dopaminergic neuron cell line MES 23.5 (Figure 5D-5F) and the N9 microglial cell line (Figure 5G-5I) revealed that treatment with resveratrol induced a significant decrease in AT1 receptor expression with no significant change in levels of AT2 receptors (i.e. a decrease in the AT1 to AT2 ratio), as well as decreased expression of p47<sup>phox</sup> (i.e. NADPH-oxidase activation). All of these changes were inhibited by the simultaneous treatment with the SIRT1 specific inhibitor EX527, which indicates that SIRT1 activation plays a major role in the above described effects of resveratrol.

As down regulation of AT1 receptors is a key finding of this study, the resveratrol-induced decrease in AT1 receptor expression was confirmed by quantitative RT-PCR in rats and cultures, which also revealed a resveratrol-induced decrease in AT1 mRNA expression. This indicates that the downregulation of AT1 receptor expression takes place at the transcriptional level and confirms the specificity of the results obtained with the AT1 antibody (Figure 6).

## DISCUSSION

In the present study, we observed the presence of SIRT1 in dopaminergic neurons and glial cells in the substantia nigra of rodents and in primary mesencephalic cultures and cell lines of dopaminergic and microglial cells. We also observed an important reciprocal regulation between SIRT1 and the local RAS both *in vivo* and *in vitro*.

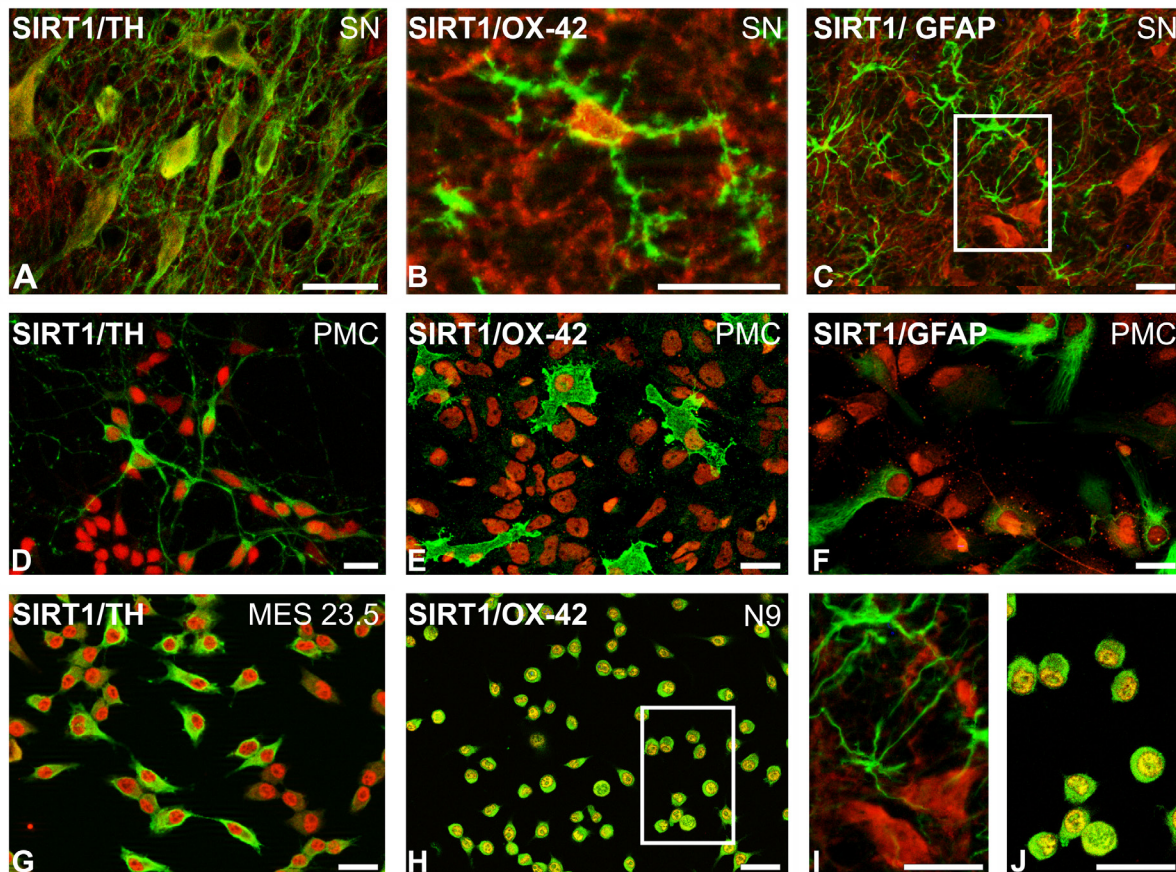

**Figure 1: Double immunofluorescence and laser confocal microscopy showing co-localization (yellow) of the dopaminergic marker TH (green; A,D,G), the microglial marker OX-42 (green; B,E,H,J), or the astroglial marker GFAP (green; C,F,I) and SIRT1 (red).** SIRT1 expression was observed in the nucleus and cytoplasm of dopaminergic neurons A, D, G and microglial cells B, E, H, J in the substantia nigra A, B, primary cultures D, E and dopaminergic G and microglial H, J cell lines. SIRT1 expression was observed in astrocytes in cultures F but not clearly distinguished in astrocytes in the nigra of control rats C, I. Boxed areas in C and H are magnified in I and J. Scale bars: 25µm. GFAP, glial fibrillary acid protein; TH, tyrosine hydroxylase; PMC, primary neuron-glia mesencephalic cultures.

## Effects of RAS on SIRT1 expression

Intraventricular administration of AII to young rats induced an increase in SIRT1 expression in the nigral region. The increase in SIRT1 expression may counteract AII-induced oxidative stress (OS). In several types of cells, SIRT1 stimulates resistance to oxidative stress through peroxisome proliferator activated receptor gamma coactivator 1 $\alpha$  (PGC-1 $\alpha$ ) [38], FOXO [5, 39] and manganese superoxide dismutase (Mn-SOD) [6]; see for review [7]. In the present study, we have shown that SIRT1-induced downregulation of the AT1/NADPH-oxidase axis constitutes an important additional mechanism to counteract OS and inflammation (see below). In young rats, we also observed a lack of response of SIRT1 to chronic stimulation with AII (i.e. seven daily injections). This may be explained because a persistent increase in OS was found to mediate SIRT1 degradation and decreased SIRT1 expression [40, 41]; however, in this case, a decrease in SIRT1 expression below control levels is expected, and we observed no differences between young rats subjected to chronic stimulation with AII and untreated controls. A more interesting explanation is related to AII-induced desensitization of the AT1 receptor, which has been previously observed in different tissues and cell culture models [42-44]. Signal transduction by G-protein-coupled receptors is often accompanied by desensitization, which has been related to three major mechanisms [45]: 1) rapid uncoupling from G-protein, 2) sequestration of receptors into endosomal vesicles, and 3) downregulation of the total number of receptors. Further research is required to fully clarify the mechanism responsible for the lack of response of SIRT1 to chronic stimulation with AII. However, an interesting possibility may be related to a SIRT1-induced downregulation of AT1 receptors observed in the present study and discussed in the following section.

In aged rats, we observed a decrease in levels of SIRT1 relative to young control despite the fact that RAS activity and markers of OS and neuroinflammation are known to be enhanced [30, 33, 34]; a counterregulatory increase in SIRT1 levels may be expected, as observed in young rats. A decline in SIRT1-protein levels with aging has also been observed in other organs such as thymus and heart, although the responsible mechanisms remain

**Figure 2: Western blot analysis of changes in the expression of SIRT1 in the nigral region** In young adult rats after a single or seven intraventricular injections of AII or vehicle **A.**, aged rats relative to control (i.e. young) rats or aged rats treated with resveratrol **B.**, and in aged and young AT1 KO mice relative to wild type controls of the same age **C.** Protein expression was measured relative to the GAPDH band value. The results were normalized to the values for controls (100%). Data are means  $\pm$  SEM. \* $p$  < 0.05 relative to controls (Student's  $t$  test). AII, angiotensin 2; x1, single injection; x7, 7 consecutive injections for 7 days; CO, control; RV, resveratrol.

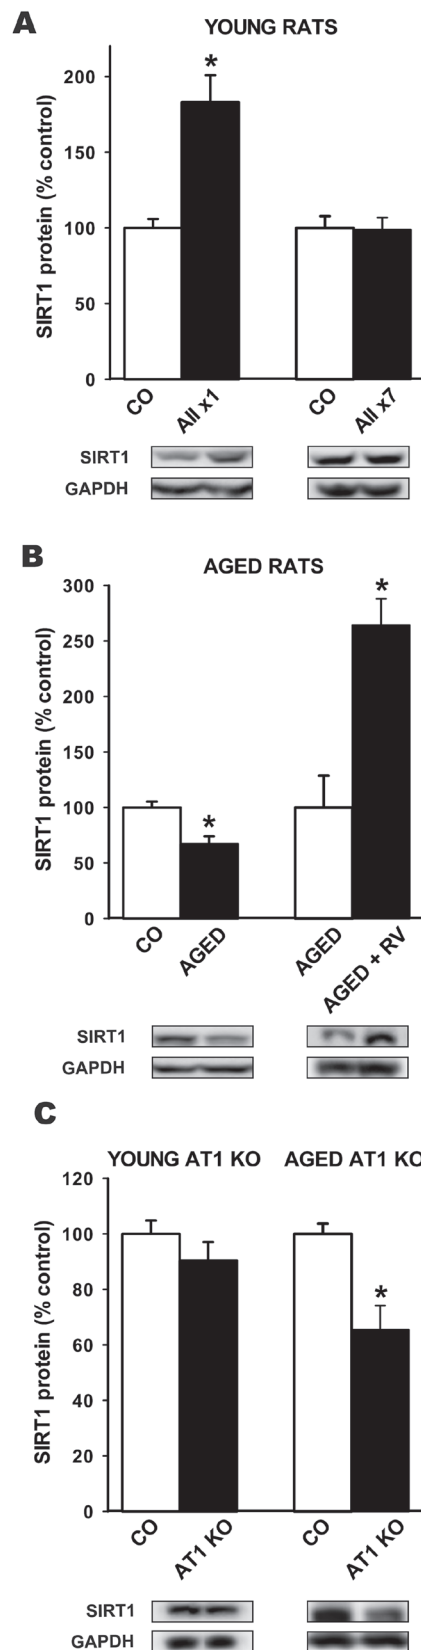

unclear [46, 47]. It has been suggested that a decrease in nuclear SIRT1 activity may be the initial event, which may start the age-related mitochondrial decline and other age-related major degenerative changes [8], which may include the increased AT1 expression and NADPH-oxidase activity observed in aged animals (i.e. the loss of the counter-regulatory mechanism of SIRT1 on AT1/NADPH-oxidase described in the present study). In the substantia nigra of aged rats similar age-related inability to upregulate other compensatory mechanisms against OS and neuroinflammation has been observed [33, 34, 48]. In the present study, we also observed that the level of SIRT1-protein expression was higher in aged (18 month-old) wild type mice than AT1 KO mice of the same age, in which RAS activity and OS are known to be lower [23, 49, 50]. This suggests that in aged wild-type mice, higher RAS activity and OS lead to discrete compensatory upregulation of SIRT1 expression. A previous study showed that SIRT1 levels did not differ significantly in the kidneys of very old mice (aged 26-30 months) and AT1 KO mice of similar age [23], which suggests that very old WT mice have already lost the minimal capacity to upregulate SIRT1 expression in response to overactivation of the AII/AT1 pathway, and possibly also in response to other OS inducers; however, the differences in findings may also be related to the type of tissues used (i.e. kidney

and brain). It is also interesting that no differences in SIRT1 expression was observed between young WT and young AT1 KO mice, which suggests that the AII/AT1 pathway does not upregulate SIRT1 expression under control physiological levels of AT1 activity (i.e. in young WT mice).

*In vitro* studies were performed to identify the cell types involved in the above-mentioned effects. SIRT1 expression was observed in neurons, astrocytes and microglia in cultures. However, the present studies of the substantia nigra revealed much lower SIRT1-protein expression in astrocytes than in neurons and microglia. Several recent studies have reported major effects of SIRT1 and SIRT1-activating compounds on the microglial neuroinflammatory response [16, 17, 51]. Neuroinflammation and microglial activation are known to play a major role in the progression of dopaminergic degeneration in PD models and PD [52-55]. Microglial cells also mediate major effects of RAS hyperactivity on dopaminergic neuron degeneration [26, 27, 56]. Therefore, we investigated the effects of AII treatment on the dopaminergic neuron cell line MES 23.5 and on the N9 microglial cell line. In both dopaminergic neurons and microglial cells, AII induced an increase in SIRT1 expression. Consistent with that observed after chronic stimulation with AII *in vivo*, the increase

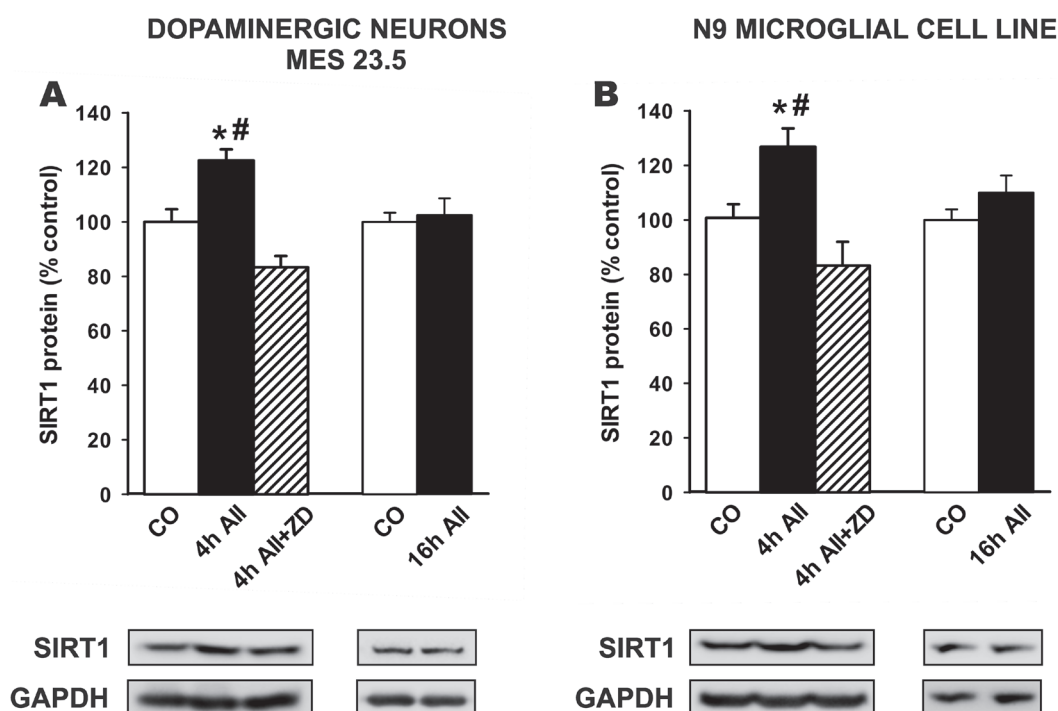

**Figure 3: Western blot analysis of changes induced by treatment with AII (100 nM) in the expression of SIRT1 in the dopaminergic cell line MES 23.5 A. and the N9 microglial cell line B.** The AII-induced increase in SIRT1 expression was inhibited by the AT1 receptor antagonist ZD-7155. Protein expression was measured relative to the GAPDH band value. The results were normalized to the values for controls (100%). Data are means  $\pm$  SEM. \* $p < 0.05$  relative to controls; # $p < 0.05$  relative to AII+ZD group (one-way ANOVA followed by Student-Newman Keuls). AII, angiotensin II; CO, control; ZD, AT1 antagonist ZD-7155

in SIRT1 expression was detected after 4 h but not after 16 h (see above). In previous studies, we observed that treatment with AII induced an increase in OS in

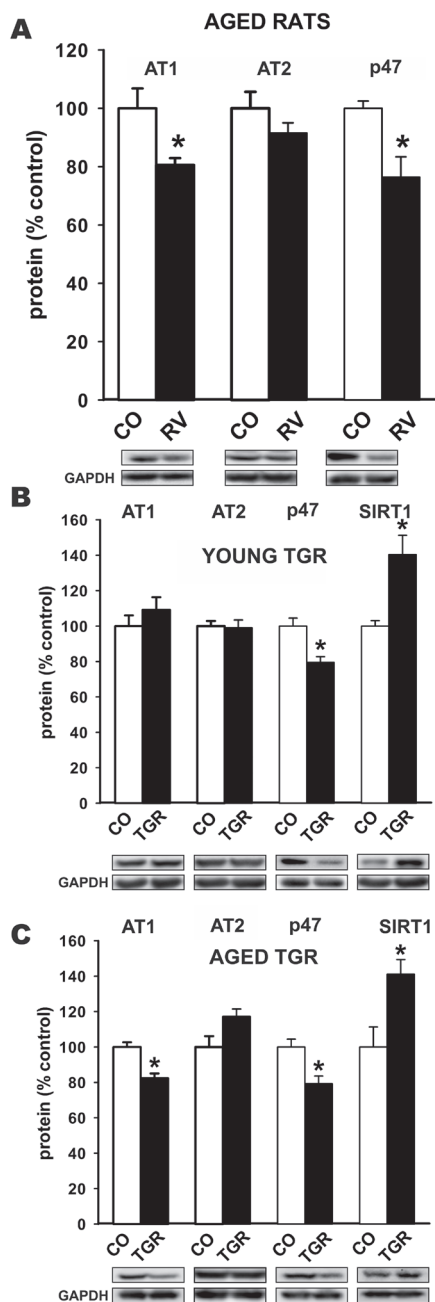

**Figure 4: Western blot analysis of changes in the expression of angiotensin receptors (AT1 and AT2) and NADPH-oxidase activation (i.e. p47<sup>phox</sup> subunit expression) in the nigral region in aged rats treated with resveratrol or vehicle A., and in young B. and aged C. transgenic mice over-expressing SIRT1 relative to wild type controls of the same age. Protein expression was measured relative to the GAPDH band value. Protein expression was measured relative to the GAPDH band value. The results were normalized to the values for controls (100%). Data are means  $\pm$  SEM. \* $p < 0.05$  relative to controls (Student's *t* test). CO, control; p47, p47<sup>phox</sup>; RV, resveratrol, TGR, transgenic mice over-expressing SIRT1.**

dopaminergic neurons via activation of neuronal AT1 receptors and, particularly, via activation of AT1 microglial receptors, which exacerbated the microglial neuroinflammatory response, leading to the release of NADPH-oxidase-dependent superoxide and inflammatory cytokines, which act on dopaminergic neurons [26,27, 56, 57]. The present *in vitro* experiments indicate that activation of the AII/AT1 leads to compensatory increases in SIRT1 expression in both dopaminergic neurons and microglial cells. This is consistent with several recent findings showing that SIRT1 and the SIRT1-activating compound resveratrol exert neuroprotection via inhibition of the microglial neuroinflammatory response [16-18, 51]. It is also consistent with the results of the present study, which show that resveratrol, via SIRT1, inhibits the pro-inflammatory and oxidative AII/AT1 pathway in neurons and microglial cells (see below).

### Effects of SIRT1 on RAS activity

The effects of SIRT1 on RAS activity were studied *in vivo* by treatment of rats with the SIRT1-activating compound resveratrol and in transgenic mice overexpressing SIRT1. Previous studies have shown RAS hyperactivity in the nigra of aged rats relative to young control rats; increased expression of AT1 receptors, decreased expression of AT2 receptors and increased NADPH-oxidase activity were observed in aged rats [33, 34, 48]. In the present study, treatment with resveratrol induced a significant decrease in RAS activity in aged rats (i.e. a decrease in AT1 receptor expression and NADPH-oxidase activity). In the nigral region of young transgenic mice, moderately increased SIRT1 expression and decreased expression of the NADPH-oxidase subunit p47<sup>phox</sup>, reflecting a decrease in NADPH-oxidase activity, were observed. A decrease in the expression of p47<sup>phox</sup> in mice overexpressing SIRT1 is consistent with previous findings suggesting that inhibition of translocation of p47<sup>phox</sup> is a major factor in the neuroprotective effects of SIRT1 and resveratrol, which did not exert neuroprotective effects in cultures from NADPH-oxidase-deficient mice [18, 58]. However, we did not observe any significant changes in the levels of angiotensin receptors relative to those in young control mice. This is consistent with previous findings showing that the SIRT1 transgenic mice were protected against high-fat-diet-induced increase in hepatic inflammatory cytokines but levels of cytokines were not different from WT mice under normal diet [59]. This is also consistent with the present findings in young AT1 KO mice, in which no significant changes in SIRT1 expression were observed. However, SIRT1 overexpression and treatment with the SIRT1-activating compound resveratrol counteract the abnormal increase in RAS activity observed in aged animals. This was confirmed in aged transgenic mice over-expressing SIRT1, which showed decreased AT1 and NADPH (p47<sup>phox</sup>) expression relative to WT mice

of the same age.

The inhibitory effect of resveratrol and SIRT1 overexpression on the AII/AT1/NADPH-oxidase pathway was confirmed in primary mesencephalic cultures, in the dopaminergic neuron cell line MES 23.5 and in the N9 microglial cell line. Treatment with resveratrol induced a significant decrease in levels of AT1 and p47<sup>phox</sup>, and this effect was blocked by the simultaneous treatment with the SIRT1 inhibitor EX527, which is consistent with the major role of SIRT1 in the inhibitory effects of resveratrol on the microglial response [16-18, 51].

The exact mechanism responsible for the inhibitory effect of SIRT1 on the AII/AT1 pathway remains to be

fully clarified. However, the present findings revealed a resveratrol-induced decrease in AT1 mRNA expression, which indicates that the downregulation of AT1 receptor expression takes place at the transcriptional level. SIRT1 stimulates resistance to oxidative stress through activation of several transcription factors including PGC-1 $\alpha$  [38] and FOXO [5, 39]. However, it is also known that SIRT1 downregulates the activity of the transcription factor NF- $\kappa$ B [59, 60], which is particularly interesting for the present study. In microglial cells, we have recently shown a positive correlation between AT1 expression, NADPH activity, NF- $\kappa$ B and Rho kinase (ROCK), which may provide a basic means of coordinating the

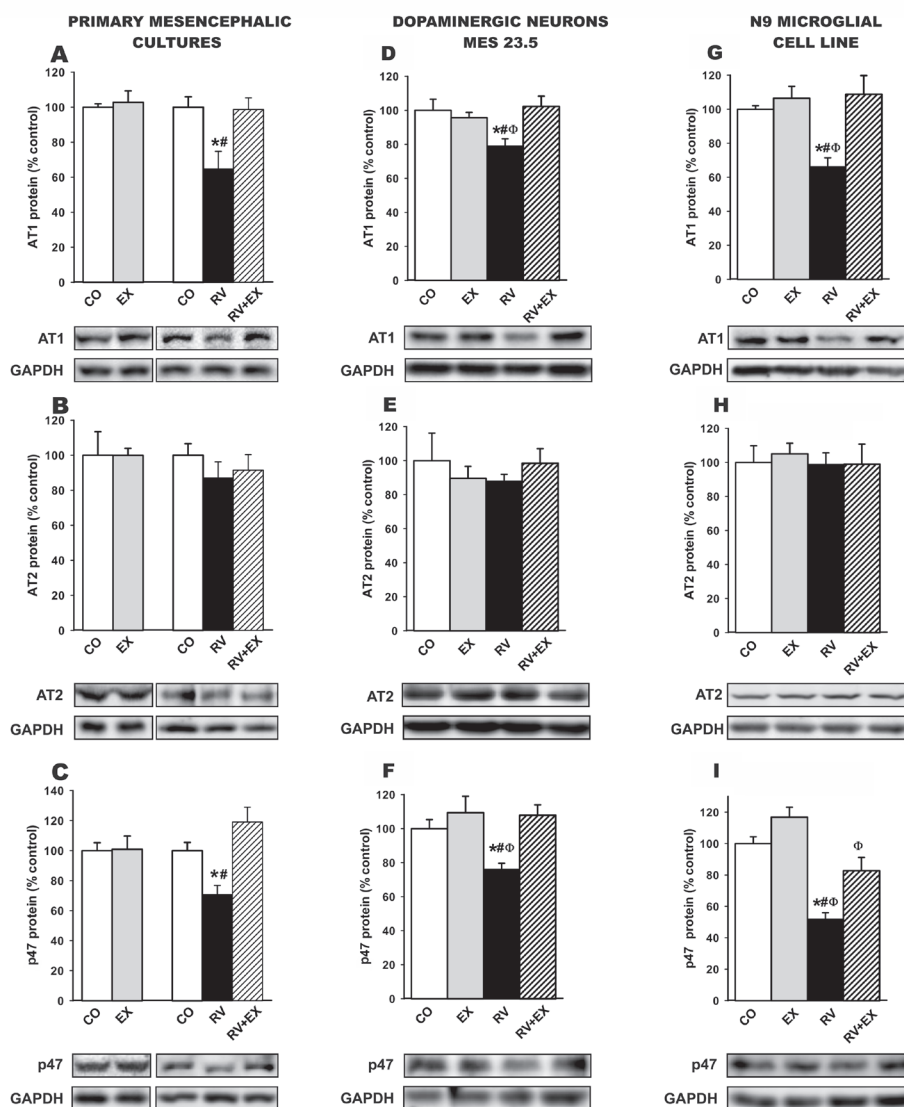

**Figure 5: Western blot analysis of changes induced by treatment with resveratrol (RV) and resveratrol plus the SIRT1 specific inhibitor EX527 (RV+EX) in the expression of angiotensin receptors (AT1 and AT2) and NADPH-oxidase activation (i.e. p47<sup>phox</sup> subunit expression) in primary (neuron-glia) mesencephalic cultures A.-C., the dopaminergic cell line MES 23.5 D.-F. and the N9 microglial cell line G.-I.** The RV-induced decrease in AT1 and p47<sup>phox</sup> subunit expression was inhibited by the SIRT1 specific inhibitor EX527. Protein expression was measured relative to the GAPDH band value. The results were normalized to the values for controls (100%). Data are means  $\pm$  SEM. \* $p < 0.05$  relative to controls, # $p < 0.05$  relative to RV+EX,  $\phi p < 0.05$  relative to EX (one-way ANOVA followed by Student-Newman Keuls). AII, angiotensin II; CO, control; EX, SIRT1 inhibitor EX527; p47, p47<sup>phox</sup>; RV, resveratrol.

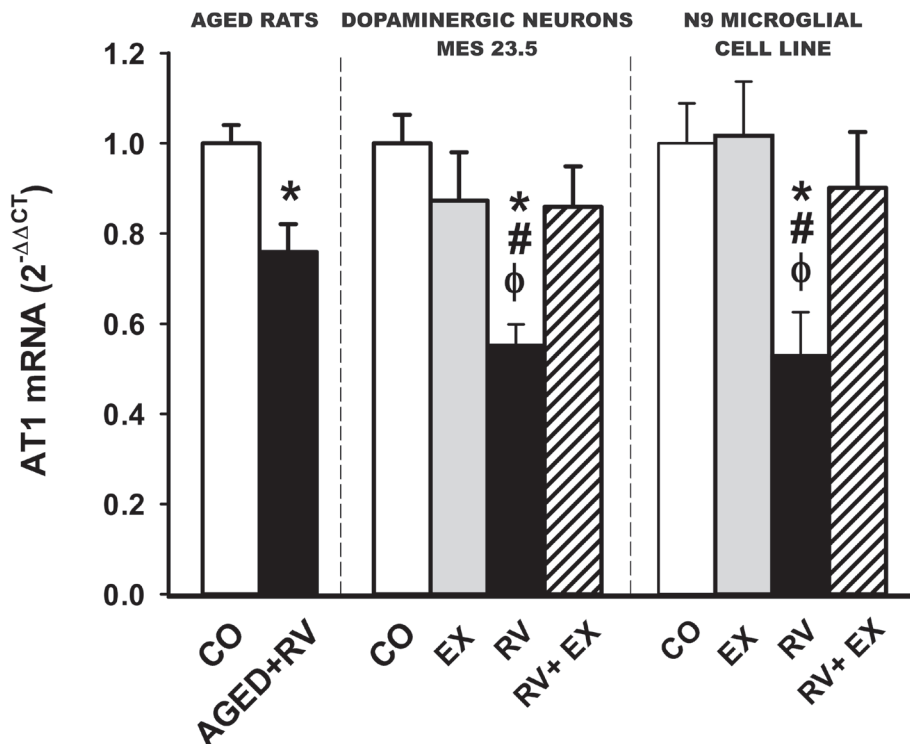

**Figure 6: Real-time quantitative RT-PCR analysis of changes in the expression of AT1** in the nigral region in aged rats treated with resveratrol or vehicle, and in cultures of the dopaminergic cell line MES 23.5 and the N9 microglial cell line treated with resveratrol or resveratrol plus the SIRT1 specific inhibitor EX527. The comparative cycle threshold values method ( $2^{-\Delta\Delta Ct}$ ) was used. The expression of each gene was measured relative to that of the housekeeping transcripts ( $\beta$ -Actin). Data are means  $\pm$  SEM. \* $p < 0.05$  relative to controls, # $p < 0.05$  relative to RV+EX,  $\phi p < 0.05$  relative to EX (Student's *t* test and one-way ANOVA followed by Student-Newman Keuls). CO, control; Ct, cycle threshold; EX, SIRT1 inhibitor EX527; RV, resveratrol.

microglial neuroinflammatory response [56]: AII, via AT1 receptors, induces NADPH-oxidase activation and superoxide generation, which leads to NF- $\kappa$ B translocation and ROCK activation. ROCK activation in turn induces NADPH-oxidase activation via p38 MAPK through a feed-forward mechanism. Moreover, ROCK activation, via NF- $\kappa$ B, upregulated AT1 receptor expression in microglial cells through a feed-forward mechanism [56]. Several studies in different types of cells have shown that SIRT1 inhibits NADPH oxidase activation [58, 61]. Therefore, a SIRT1-induced decrease in NADPH activity may lead to inhibition of NF- $\kappa$ B and the positive feedback mechanism on AT1 receptors and other components of the microglial neuroinflammatory response [56]. Additional mechanisms may also be involved in SIRT1-induced inhibition of NF- $\kappa$ B and AT1 mRNA expression [7, 60].

In conclusion, the local RAS and SIRT1 both play major roles in the modulation of neuroinflammation, oxidative stress and aging-related cell degeneration, and particularly dopaminergic vulnerability to damage. The present results show that SIRT1 and the axis AII/AT1/NADPH-oxidase regulate each other in the modulatory process and that this mechanism is impaired in aged animals and it may be mitigated with Sirtuin-activating

compounds such as resveratrol.

## MATERIALS AND METHODS

### Experimental design

Both *in vivo* and *in vitro* experiments were conducted. *In vivo* experiments were carried out with young adult (10-weeks old at the beginning of the experiments) and aged (18 to 20-months old) male Sprague Dawley rats, and male C57BL-6 wild type (WT), knockout (KO) and transgenic mice. A first group of mice were young adult (eight weeks old) and aged (18 to 20-months old) male WT C57BL-6 mice (Charles River, L'Arbresle, France), and young and aged homozygous C57BL-6 mice deficient for AT1a (the major mouse AT1 isoform and the closest murine homolog to the single human AT1; strain B6.129P2-Agtr1atm1Unc/J, Jackson Laboratory, Bar Harbor, ME, USA). A second group of C57BL-6 mice were young and aged transgenic mice, in which SIRT1 is moderately over-expressed under its own promoter, thereby following the physiological pattern



of expression [59], and the corresponding WT controls. Rats and mice were housed under a 12 h light/dark cycle with ad libitum access to food and water. All experiments were carried out in accordance with Directive 2010/63/EU and Directive 86/609/CEE and were approved by the corresponding committee at the University of Santiago de Compostela. All rats and mice were anaesthetized with ketamine/medetomidine prior to undergoing surgery.

A first series of *in vivo* and *in vitro* experiments was undertaken to investigate the effects of increased RAS activity on SIRT1 levels. First, one group of young rats received one or seven intraventricular injections of AII ( $n = 24$ ; see below) to investigate the effects of increased AII levels on SIRT1 levels in the nigral region. As RAS activity in the nigral region is known to be higher in aged rats than in young rats (i.e. increased activity in the AII/AT1/NADPH-oxidase pathway; see [33, 34] for details), we also investigated the levels of SIRT1 in aged rats ( $n = 6$ ) relative to young rats ( $n = 6$ ); in addition, aged rats were treated with the SIRT1-activating compound resveratrol to study the effects on levels of SIRT1 ( $n = 5$ ) relative to untreated aged rats ( $n = 7$ ). The effect of the AII/AT1 pathway on nigral SIRT1 levels was further investigated in young ( $n = 7$ ) and aged ( $n = 6$ ) mice deficient in AT1 receptors (AT1 KO mice), by comparison with young ( $n = 7$ ) and aged ( $n = 6$ ) WT mice. In previous studies, we observed that AII exerts pro-oxidative and pro-inflammatory effects by acting directly on dopaminergic neuron AT1 receptors and, particularly, on microglial cells; see [35, 36] for review. In the present study, we therefore investigated the *in vitro* effect of AII on SIRT1 levels in cultures of the dopaminergic neuron cell line MES 23.5 and the N9 microglial cell line.

A second series of *in vivo* and *in vitro* experiments was undertaken to investigate the effects of increased SIRT1 levels on the activity of the AII/AT1/NADPH-oxidase pathway. First, aged rats (i.e. rats with increased AII/AT1 activity) were treated with the SIRT1-activating compound resveratrol ( $n = 9$ ). We then determined nigral levels of AT1 and AT2 receptor expression and p47<sup>phox</sup> (a marker of activation of the NADPH-oxidase complex) relative to untreated aged rats ( $n = 11$ ). We then investigated the expression of the same compounds in young ( $n = 7$ ) and aged ( $n = 4$ ) transgenic mice over-expressing SIRT1, relative to expression in the corresponding young ( $n = 7$ ) and aged ( $n = 6$ ) WT controls. We investigated *in vitro* the effects of treatment with resveratrol on primary mesencephalic neuron-glia cultures and on cultures of the dopaminergic neuron cell line MES 23.5 and the N9 microglial cell line. The role of SIRT1 activation in the resveratrol-induced effects was confirmed with the specific SIRT1 inhibitor EX527.

The brains were rapidly removed from rats and mice and the mesencephalon was sliced coronally (1 mm) with a tissue chopper. To isolate the nigral region (SNc), the individual 1mm tissue slides were dissected on

a pre-cooled glass plate under a stereoscopic microscope. The substantia nigra compacta (SNc) was dissected according to [62], frozen on dry ice, and stored at  $-80^{\circ}\text{C}$  until processed for western blot (WB) or real-time quantitative RT-PCR (RT-PCR) studies (see below). In addition, some rats ( $n = 4$ ) were sacrificed, perfused with 4% paraformaldehyde (PFA) and processed for histology (see below). Cultures were also processed for WB and RT-PCR as detailed below. Brain sections of rat substantia nigra and different types of cultures were processed for immunofluorescence and confocal microscopy to confirm the presence of SIRT1 protein in the different types of cells investigated in the present study.

### Treatment of rats with intraventricular AII and resveratrol

Young adult rats were anaesthetized and divided into two groups. As it is known that AII does not cross the BBB under normal conditions, one group of rats was injected in the third ventricle (stereotaxic coordinates: 0.8 mm posterior to bregma, midline, 6.5 mm ventral to the dura, and tooth bar at 0) with a single injection of AII ( $5\mu\text{g}$  in  $3\mu\text{l}$  of sterile saline,  $n = 6$ ; Sigma). The solution was injected using a  $10\mu\text{l}$  Hamilton syringe coupled to a motorized injector (Stoelting), at a rate of  $0.5\mu\text{l}/\text{min}$ . Another group of rats was injected with a  $5\mu\text{g}$  injection for seven consecutive days ( $n = 6$ ). The consecutive injections were performed using a single cannula placed in the third ventricle during the whole injection period as described previously [63]. Control rats were injected with vehicle ( $n = 6$  per group). Sixteen hours after the last AII injection the rats were killed and processed for western blotting (WB). The effective doses of AII and survival period were determined on the basis of our previous findings [63].

Resveratrol was freshly prepared in an emulsion of ethanol in olive oil ( $10\text{mg}/\text{ml}$ ). Rats were intraperitoneally injected twice a day every day for 10 days with either  $15\text{mg}/\text{Kg}$  resveratrol ( $30\text{mg}/\text{Kg}/\text{day}$ ; R5010 Sigma Chemicals) or with vehicle [59-61]. Finally, rats were killed 1 h after the last injection. The dose of resveratrol was selected on the basis of earlier reports, which have demonstrated the neuroprotective properties of the compound at doses ranging from 20 to  $50\text{mg}/\text{kg}$  [64-66].

### Primary mesencephalic neuron-glia cultures

Ventral mesencephalic tissue was dissected from rat embryos of 14 days of gestation (E14). The tissue was incubated in 0.1% trypsin (Sigma), 0.05% DNase (Sigma, St. Louis, MO, USA) and DMEM (Invitrogen Life Technologies, Paisley, Scotland, UK) for 20 min at  $37^{\circ}\text{C}$ , and was then washed in DNase/DMEM and mechanically dissociated. The resulting cell suspension

was centrifuged at 50 g for 5 min, the supernatant was then removed carefully and the pellet was resuspended in 0.05% DNase/DMEM to the final volume required. The number of viable cells in the suspension was estimated by acridine orange/ethidium bromide staining, and cells were plated onto 35-mm culture dishes (Falcon, Becton Dickinson, Franklin Lakes, NJ, USA) previously coated with poly-L-lysine (100 µg/ml; Sigma) and laminin (4 µg/ml; Sigma). The cells were seeded at a density of  $1.5 \times 10^5$  cells/cm<sup>2</sup> and maintained under control conditions [DMEM/HAMS F12/(1:1) containing 10% fetal bovine serum (FBS; BiochromKG, Berlin, Germany)]. The cell cultures were maintained in a humidified CO<sub>2</sub> incubator (5% CO<sub>2</sub>; 37 °C) for 7 days *in vitro* (DIV); the medium was totally removed on day 2 and replaced with fresh culture medium.

### **N9 microglial and MES 23.5 dopaminergic neuron cell line cultures**

The murine N9 microglial cell line was provided by Dr Paola Ricciardi-Castagnoli (Singapore Immunology Network, Agency for Science, Technology and Research, Singapore). The N9 microglial cells were cultured in Roswell Park Memorial Institute medium (RPMI 1640; Invitrogen, 21,875-091) supplemented with 10% FBS, 2mM-Glutamine (Sigma, G6392), 100 U/ml penicillin, and 100 mg/ml streptomycin, and the cultures were maintained at 37°C, 95% air, and 5% CO<sub>2</sub> in a humidified incubator [67]. The cells were then seeded onto 35-mm culture dishes (0.5 x 10<sup>6</sup> cells/ well) for analysis.

Dopaminergic MES 23.5 cells, a gift from Dr Wei-dong Le (Baylor College of Medicine, TX, USA), were cultured in DMEM/F12 containing Sato components growth medium supplemented with 2% fetal bovine serum (FBS), 100 units/ml penicillin, and 100 mg/ml streptomycin at 37 °C in a humidified CO<sub>2</sub> incubator (5% CO<sub>2</sub>, 95% air) [68]. For experiments, MES 23.5 cells were plated at a density of  $0.5 \times 10^5$ /cm<sup>2</sup> onto 35-mm plastic dishes, glass coverslips, previously coated with poly-L-ornithine (P-4638, Sigma; 10 mg/ml). Cells were stimulated to enhance differentiation by adding dibutyryl-cAMP (D0627, Sigma; 1 mM) to the supplemented growth medium, and they were grown to 80% confluence before the start of any treatment.

### **Treatment of cultures**

Cultures in the first series of experiments were treated with AII (100 nM) for 4 or 16 h. The most effective dose of AII was determined on the basis of our previous findings [26, 27]. Some cultures were treated with the AT1 receptor antagonist ZD 7155 (1 µM; Sigma) for 30 minutes before treatment with AII to confirm the involvement of AT1 receptors. Cultures in the

second series of experiments were exposed to the SIRT1 activator resveratrol (50 µM; Cayman chemical) or the SIRT1 specific inhibitor Ex 527 (Tocris; 1µM) [69, 70] for 30 min before treatment with resveratrol. The cells were then washed and processed for WB or RT-PCR.

### **Western blotting of rat and mouse brains and cell cultures**

Tissue from rat and mouse ventral midbrain and cultured cells (primary mesencephalic cultures, MES23.5 cells, N9 cells) were lysed in RIPA buffer containing protease inhibitor cocktail (P8340, Sigma) and PMSF (P7626, Sigma). Cell and tissue lysates were centrifuged, and the protein concentrations were determined by the BCA protein assay (Pierce 23225). Equal amounts of protein were separated by 10% Bis-Tris polyacrylamide gel, and transferred to nitrocellulose membranes. The membranes were incubated overnight with primary antibodies rabbit anti-SIRT1 (Millipore 07-131), goat anti-AT1 (sc-31181), rabbit anti-AT2 (sc-9040), and rabbit anti-p47<sup>phox</sup> (sc-14015) from Santa Cruz Laboratories 1:200. The specificity of the antibodies was established in previous studies: AT1 sc-31181 [71], AT2 sc-9040 [72, 73], p47<sup>phox</sup> sc-14015 [74], Sirt1 Millipore 07-131 [75, 76]. In addition, the specificity of the antibodies was confirmed in our laboratory by preadsorption with the corresponding synthetic peptide antigen [77] and western blot analysis of lysates from HEK293 cells transfected with AT1 or AT2 tagged to fusion tail DDK (TA50011 from Origene; DDK tag: DYKDDDDK). The specificity of the antibodies was confirmed by the presence of a predominant immunoreactive band in positively transfected lysates and the absence of this band in negative controls, which consisted of lysates transfected with empty vectors. The HRP conjugated secondary antibodies used were Protein A (NA9120V, GE Healthcare; 1:5000) and Chicken anti-mouse IgG (sc-2954, Santa Cruz Biotechnology Inc; 1:3000). Immunoreactivity was detected with an Immun-Star HRP Chemiluminescent Kit (170-5044, Bio-Rad) and visualized with a chemiluminescence detection system (Molecular Imager ChemiDoc XRS System, Bio-Rad). Blots were reprobated for anti-GAPDH (G9545, Sigma; 1:50000) as a loading control. In each sample, protein expression was measured by densitometry of the corresponding band and expressed relative to the GAPDH band value. The data were then normalized to the values of the control group of the same batch (i.e., they were expressed relative to the value obtained for the control; 100%) to counteract any inter-batch variability. Finally, the results were expressed as means ± SEM.

## RNA extraction and real-time quantitative polymerase chain reaction

Total RNA from the nigral region was extracted with Trizol (Invitrogen, Paisley, UK), according to the manufacturer's instructions. Total RNA (2.5 µg) was reverse-transcribed to complementary DNA with nucleoside triphosphate containing deoxyribose, random primers, and Moloney murine leukemia virus reverse transcriptase (200U; Invitrogen). Real-time PCR was used to examine the relative levels of type 1 angiotensin receptors. Experiments were performed with a real-time iCycler™ PCR platform (BioRad, Hercules, CA, USA). β-Actin was used as housekeeping gene and was amplified in parallel with the genes of interest. The comparative cycle threshold values (Ct, cycle threshold) method ( $2^{-\Delta\Delta Ct}$ ) was used to examine the relative mRNA expression [78, 79]. A normalized value is obtained by subtracting Ct of β-actin from Ct of the interest ( $\Delta Ct$ ). As it is uncommon to use  $\Delta Ct$  as relative expression data due to this logarithmic characteristic, the  $2^{-\Delta\Delta Ct}$  parameter was used to express the relative expression data [78, 79]. Finally, the results were expressed as mean values ± SEM. Primer sequences were as follows: for AT1a, forward 5'-TTCAACCTCTACGCCAGTGTG-3', reverse 5'-GCCAAGCCAGCCATCAGC-3', and for β-actin, forward 5'-TCGTGCGTGACATTAAGAG-3', reverse 5'-TGCCACAGGATTCCATACC-3'.

## Double immunofluorescence of rat substantia nigra and cell cultures

Rats used for double immunofluorescence were killed and perfused with 0.9% saline and then with cold 4% PFA in 0.1 M phosphate buffer (PB), pH 7.4. The brains were removed and subsequently washed and cryoprotected in the same buffer containing 30% sucrose, and finally cut into 30-µm sections on a freezing microtome. Cultures used for double immunofluorescence analysis were grown on glass coverslips and fixed with 4% paraformaldehyde (PFA) in Dulbecco's phosphate buffered saline (DPBS; pH 7.4) for 20 min. The cultures and brain sections were subsequently processed for double fluorescent labelling and incubated overnight at 4 °C with the corresponding primary antibodies diluted in DPBS-1% bovine serum albumin (BSA) with 2% normal donkey serum (Sigma). The following primary antibodies were used: rabbit anti-Sirt1 (Millipore 07-131); mouse monoclonal anti tyrosine hydroxylase (TH; Sigma, 1:5000), as a marker of dopaminergic neurons; mouse anti CD11b (complement receptor-3, clone MRC OX42, Serotec; 1:50) as a marker of microglial cells; mouse anti NeuN (1:500, Millipore; as a neuronal marker), and mouse anti glial fibrillary acidic protein (GFAP, Millipore, 1:500), as a marker of astrocytes. The cultures were rinsed with DPBS and then

incubated for 2h with the following fluorescent secondary antibodies: Alexa Fluor 568-conjugated donkey anti-rabbit IgG (1:200; Molecular Probes) and Alexa Fluor 488-conjugated donkey anti-mouse IgG (1:200; Molecular Probes). Finally, cultures were incubated for 30 min at RT with the DNA-binding dye Hoechst 33342 ( $3.9 \times 10^{-5}$  M in DPBS) and coverslipped with Immumount (Thermo-Shandon). Colocalization of markers was confirmed by confocal laser microscopy (TCS-SP2; Leica, Heidelberg, Germany) and use of a sequential scanning method to prevent overlap. In all experiments, the control cultures, in which the primary antibody was omitted, were immunonegative for these markers. Tissue sections were counterstained with Hoechst 33342, mounted on gelatin-coated slides and coverslipped with Immumount. Colocalization of markers was confirmed by confocal laser microscopy.

## Statistical analysis

All data were obtained from at least three independent experiments and were expressed as mean values ± SEM. Two-group comparisons were carried out with the Student's t test and multiple comparisons with one-way ANOVA followed by Student-Newman Keuls. The normality of populations and homogeneity of variances were tested before each ANOVA. Differences were considered as statistically significant at  $p < 0.05$ . Statistical analyses were carried out with SigmaStat 3.0 from Jandel Scientific (San Rafael, CA, USA).

## ACKNOWLEDGMENTS

The authors thank Dr. Paula Ricciardi-Castagnoli and Dr. Wei-Dong Le for providing the microglial N9 cell line and the MES23.5 dopaminergic cell line, respectively, and Dr. Manuel Serrano and Dr. Ruben Nogueiras for providing the transgenic mice over-expressing SIRT1. We thank Begoña Gonzalez, Iria Novoa and Jose Trillo for their technical assistance. Grant sponsor: Spanish Ministry of Economy and Competitiveness (BFU2012-37087). Grant sponsors: Spanish Ministry of Health (RD12/0019/0020 and Cibernet), Galician Government (XUGA), FEDER (Regional European Development Fund).

## CONFLICTS OF INTEREST

The authors have no competing interests to declare.

## REFERENCES

1. Outeiro TF, Marques O, Kazantsev A. Therapeutic role of sirtuins in neurodegenerative disease. *Biochim Biophys Acta*. 2008; 1782:363-369.

2. Nogueiras R, Habegger KM, Chaudhary N, Finan B, Banks AS, Dietrich MO, Horvath TL, Sinclair DA, Pfluger PT, Tschöp MH. Sirtuin 1 and sirtuin 3: physiological modulators of metabolism *Physiol Rev.* 2012; 92:1479-514.
3. Ghosh S, Zhou Z. SIRTain regulators of premature senescence and accelerated aging. *Protein Cell.* 2015; 6:322-333.
4. Ng F, Wijaya L, Tang BL. SIRT1 in the brain-connections with aging-associated disorders and lifespan. *Front Cell Neurosci.* 2015; 9:64.
5. Brunet A, Sweeney LB, Sturgill JF, Chua KF, Greer PL, Lin Y, Tran H, Ross SE, Mostoslavsky R, Cohen HY, Hu LS, Cheng HL, Jedrychowski MP, Gygi SP, Sinclair DA, Alt FW, Greenberg ME. Stress-dependent regulation of FOXO transcription factors by the SIRT1 deacetylase. *Science.* 2004; 303:2011-2015.
6. Tanno M, Kuno A, Yano T, Miura T, Hisahara S, Ishikawa S, Shimamoto K, Horio Y. Induction of manganese superoxide dismutase by nuclear translocation and activation of SIRT1 promotes cell survival in chronic heart failure. *J Biol Chem.* 2010; 285:8375-8382.
7. Hwang JW, Yao H, Caito S, Sundar IK, Rahman I. Redox regulation of SIRT1 in inflammation and cellular senescence. *Free Radic Biol Med.* 2013; 61:95-110.
8. Christian BE, Shadel GS. Aging: it's SIRTainly possible to restore mitochondrial dysfunction. *Curr Biol.* 2014; 24:R206-208.
9. Mercken EM, Hu J, Krzysik-Walker S, Wei M, Li Y, McBurney MW, de Cabo R, Longo VD. SIRT1 but not its increased expression is essential for lifespan extension in caloric-restricted mice. *Aging Cell.* 2014; 13:193-196.
10. McCormack AL, Di Monte DA, Delfani K, Irwin I, DeLanney LE, Langston WJ, Janson AM. Aging of the nigrostriatal system in the squirrel monkey. *J Comp Neurol.* 2004; 471: 387-395.
11. Cruz-Muros, I, Afonso-Oramas, D, Abreu, P, Pérez-Delgado, MM, Rodríguez, M, González-Hernández, T. Aging effects on the dopamine transporter expression and compensatory mechanisms. *Neurobiol Aging.* 2009; 30, 973-986.
12. Donmez G, Outeiro TF. SIRT1 and SIRT2: emerging targets in neurodegeneration. *EMBO Mol Med.* 2013; 5:344-352.
13. Duan W. Sirtuins: from metabolic regulation to brain aging. *Front Aging Neurosci.* 2013; 5:36.
14. Herskovits AZ, Guarente L. SIRT1 in neurodevelopment and brain senescence. *Neuron.* 2014; 81:471-483.
15. Okawara M, Katsuki H, Kurimoto E, Shibata H, Kume T, Akaike A. Resveratrol protects dopaminergic neurons in midbrain slice culture from multiple insults. *Biochem Pharmacol.* 2007; 73:550-560.
16. Chen J, Zhou Y, Mueller-Steiner S, Chen LF, Kwon H, Yi S, Mucke L, Gan L. SIRT1 protects against microglia-dependent amyloid-beta toxicity through inhibiting NF-kappaB signaling. *J Biol Chem.* 2005; 280:40364-40374.
17. Cho SH, Chen JA, Sayed F, Ward ME, Gao F, Nguyen TA, Krabbe G, Sohn PD, Lo I, Minami S, Devidze N, Zhou Y, Coppola G, Gan L. SIRT1 deficiency in microglia contributes to cognitive decline in aging and neurodegeneration via epigenetic regulation of IL-1 $\beta$ . *J Neurosci.* 2015; 35:807-818.
18. Zhang F, Shi JS, Zhou H, Wilson B, Hong JS, Gao HM. Resveratrol protects dopamine neurons against lipopolysaccharide-induced neurotoxicity through its anti-inflammatory actions. *Mol Pharmacol* 2010; 78:466-477.
19. McCarthy CA, Widdop RE, Denton KM, Jones ES. Update on the angiotensin AT(2) receptor. *Curr Hypertens Rep.* 2013; 15, 25-30.
20. Padia SH, Carey RM. AT2 receptors: beneficial counter-regulatory role in cardiovascular and renal function. *Pflugers Arch.* 2013; 465: 99-110.
21. Marchesi C, Paradis P, Schiffrin, EL. Role of the renin-angiotensin system in vascular inflammation. *Trends Pharmacol Sci.* 2008; 29: 367-374.
22. Ungvari Z, Csiszar A, Kaley G. Vascular inflammation in aging. *Herz.* 2004; 29: 733-40
23. Benigni A, Corna D, Zoja C, Sonzogni A, Latini R, Salio M, Conti S, Rottoli D, Longaretti L, Cassis P, Morigi M, Coffman TM, Remuzzi G. Disruption of the Ang II type 1 receptor promotes longevity in mice. *J Clin Invest.* 2009; 119: 524-530.
24. Benigni A, Orisio S, Noris M, Iatropoulos P, Castaldi D, Kamide K, Rakugi H, Arai Y, Todeschini M, Ogliari G, Imai E, Gondo Y, Hirose N, Mari D, Remuzzi G. Variations of the angiotensin II type 1 receptor gene are associated with extreme human longevity. *Age (Dordr).* 2013; 35:993-1005.
25. de Cavanagh EM, Inserra F, Ferder L. Angiotensin II blockade: how its molecular targets may signal to mitochondria and slow aging Coincidences with calorie restriction and mTOR inhibition. *Am J Physiol Heart Circ Physiol.* 2015; 309:H15-44.
26. Rodriguez-Pallares J, Rey P, Parga JA, Muñoz A, Guerra MJ, Labandeira-Garcia JL. Brain angiotensin enhances dopaminergic cell death via microglial activation and NADPH-derived ROS. *Neurobiol Dis.* 2008; 31: 58-73.
27. Joglar B, Rodriguez-Pallares J, Rodríguez-Perez AI, Rey P, Guerra MJ, Labandeira-Garcia JL. The inflammatory response in the MPTP model of Parkinson's disease is mediated by brain angiotensin: relevance to progression of the disease. *J Neurochem.* 2009; 109, 656-669.
28. Valenzuela R, Barroso-Chinea P, Muñoz A, Joglar B, Villar-Cheda B, Lanciego JL, Labandeira-Garcia JL. Location of Prorenin Receptors in Primate Substantia Nigra Effects on Dopaminergic Cell Death. *J Neuropathol Exp Neurol.* 2010; 69:1130-1142.
29. Garrido-Gil P, Valenzuela R, Villar-Cheda B, Lanciego JL, Labandeira-Garcia JL. Expression of angiotensinogen and

- receptors for angiotensin and prorenin in the monkey and human substantia nigra: an intracellular renin-angiotensin system in the nigra. *Brain Struct Funct.* 2013;218: 373-388.
30. Rey P, Lopez-Real A, Sanchez-Iglesias S, Muñoz A, Soto-Otero R, Labandeira-Garcia JL. Angiotensin type-1-receptor antagonists reduce 6-hydroxydopamine toxicity for dopaminergic neurons. *Neurobiol Aging.* 2007; 28: 555-567.
  31. Grammatopoulos TN, Jones SM, Ahmadi FA, Hoover BR, Snell LD, Skoch J, Jhaveri VV, Poczobutt AM, Weyhenmeyer JA, Zawada W. Angiotensin type 1 receptor antagonist losartan, reduces MPTP-induced degeneration of dopaminergic neurons in substantia nigra. *Mol Neurodegener.* 2007; 2: 1.
  32. Zawada WM, Banninger GP, Thornton J, Marriott B, Cantu D, Rachubinski AL, Das M, Griffin WS, Jones SM. Generation of reactive oxygen species in 1-methyl-4-phenylpyridinium (MPP+) treated dopaminergic neurons occurs as an NADPH oxidase-dependent two-wave cascade. *J Neuroinflammation.* 2011; 8: 129.
  33. Villar-Cheda B, Valenzuela R, Rodriguez-Perez AI, Guerra MJ, Labandeira-Garcia JL. Aging-related changes in the nigral angiotensin system enhances proinflammatory and pro-oxidative markers and 6-OHDA-induced dopaminergic degeneration. *Neurobiol Aging.* 2012; 33: 204e1-11.
  34. Villar-Cheda B, Dominguez-Meijide A, Valenzuela R, Granado N, Moratalla R, Labandeira-Garcia JL. Aging-related dysregulation of dopamine and angiotensin receptor interaction. *Neurobiol Aging.* 2014; 35:1726-1738.
  35. Labandeira-Garcia JL, Garrido-Gil P, Rodriguez-Pallares J, Valenzuela R, Borrajo A, Rodríguez-Perez AI. Brain renin-angiotensin system and dopaminergic cell vulnerability. *Front Neuroanat.* 2014; 8:67.
  36. Labandeira-Garcia JL, Rodriguez-Pallares J, Dominguez-Meijide A, Valenzuela R, Villar-Cheda B, Rodríguez-Perez AI. Dopamine-angiotensin interactions in the basal ganglia and their relevance for Parkinson's disease. *Mov Disord.* 2013; 28:1337-1342.
  37. Wright JW, Kawas LH, Harding JW. A Role for the Brain RAS in Alzheimer's and Parkinson's Diseases. *Front Endocrinol (Lausanne).* 2013; 4:158.
  38. Rodgers JT, Lerin C, Haas W, Gygi SP, Spiegelman BM, Puigserver P. Nutrient control of glucose homeostasis through a complex of PGC-1alpha and SIRT1. *Nature.* 2005; 434:113-118.
  39. van der Horst A, Tertoolen LG, de Vries-Smits LM, Frye RA, Medema RH, Burgering BM. FOXO4 is acetylated upon peroxide stress and deacetylated by the longevity protein hSir2(SIRT1). *J Biol Chem.* 2004; 279:28873-28879.
  40. Caito S, Rajendrasozhan S, Cook S, Chung S, Yao H, Friedman AE, Brookes PS, Rahman I. SIRT1 is a redox-sensitive deacetylase that is post-translationally modified by oxidants and carbonyl stress. *FASEB J.* 2010 ; 24:3145-3159.
  41. Wu A, Ying Z, Gomez-Pinilla F. Oxidative stress modulates Sir2alpha in rat hippocampus and cerebral cortex. *Eur J Neurosci.* 2006; 23:2573-2580.
  42. Vento PJ, Daniels D. The anteroventral third ventricle region is critical for the behavioral desensitization caused by repeated injections of angiotensin II. *Behav Brain Res.* 2014; 258: 27-33.
  43. Torsoni MA, Carvalheira JB, Calegari VC, Bezerra RM, Saad MJ, Gontijo JA, Velloso LA. Angiotensin II (AngII) induces the expression of suppressor of cytokine signaling (SOCS)-3 in rat hypothalamus - a mechanism for desensitization of AngII signaling. *J Endocrinol.* 2004; 181: 117-128.
  44. Sasamura H, Dzau VJ, Pratt RE. Desensitization of angiotensin receptor function. *Kidney Int.* 1994; 46:1499-14501.
  45. Guo DF, Sun YL, Hamet P, Inagami T. The angiotensin II type 1 receptor and receptor-associated proteins. *Cell Res.* 2001; 11:165-180.
  46. Sasaki T, Maier B, Bartke A, Scoble H Progressive loss of SIRT1 with cell cycle withdrawal. *Aging Cell.* 2006; 5:413-422.
  47. Kwon HS, Ott M. The ups and downs of SIRT1. *Trends Biochem Sci.* 2008; 33:517-525.
  48. Rodriguez-Perez AI, Valenzuela R, Villar-Cheda B, Guerra MJ, Labandeira-Garcia JL. Different dopaminergic neuroprotection of hormonal replacement therapy in young and aged menopausal rats. Role of the brain angiotensin system. *Brain* 2012; 135: 124-138.
  49. Garrido-Gil P, Joglar B, Rodriguez-Perez AI, Guerra MJ, Labandeira-Garcia JL. Involvement of PPAR-γ in the neuroprotective and anti-inflammatory effects of angiotensin type 1 receptor inhibition: effects of the receptor antagonist telmisartan and receptor deletion in a mouse MPTP model of Parkinson's disease. *J Neuroinflammation.* 2012; 9: 38.
  50. Rodriguez-Perez AI, Dominguez-Meijide A, Lanciego JL, Guerra MJ, Labandeira-Garcia JL. Inhibition of Rho kinase mediates the neuroprotective effects of estrogen in the MPTP model of Parkinson's disease. *Neurobiol Dis.* 2013; 58:209-219.
  51. Zhang F, Liu J, Shi JS. Anti-inflammatory activities of resveratrol in the brain: role of resveratrol in microglial activation. *Eur J Pharmacol.* 2010; 636:1-7.
  52. Gerhard A, Pavese N, Hotton G, Turkheimer F, Es M, Hammers A, Eggert K, Oertel W, Banati RB, Brooks DJ. *in vivo* imaging of microglial activation with [11C](R)-PK11195 PET in idiopathic Parkinson's disease. *Neurobiol Dis.* 2006; 21:404-412.
  53. Ouchi Y, Yoshikawa E, Sekine Y, Futatsubashi M, Kanno T, Ogusu T, Torizuka T. Microglial activation and dopamine terminal loss in early Parkinson's disease. *Ann Neurol.* 2005; 57:168-175.

54. Rodriguez-Pallares J, Parga JA, Muñoz A, Rey P, Guerra MJ, Labandeira-Garcia JL. Mechanism of 6-hydroxydopamine neurotoxicity: the role of NADPH oxidase and microglial activation in 6-hydroxydopamine-induced degeneration of dopaminergic neurons. *J Neurochem.* 2007; 103: 145-156.
55. Rojo AI, McBean G, Cindric M, Egea J, López MG, Rada P, Zarkovic N, Cuadrado A. Redox Control of Microglial Function: Molecular Mechanisms and Functional Significance. *Antioxid Redox Signal.* 2014; 21:1766-1801.
56. Rodriguez-Perez AI, Borrajo A, Rodriguez-Pallares J, Guerra MJ, Labandeira-Garcia JL. Interaction between NADPH-oxidase and Rho-kinase in angiotensin II-induced microglial activation. *Glia.* 2015; 63:466-482.
57. Borrajo A, Rodriguez-Perez AI, Diaz-Ruiz C, Guerra MJ, Labandeira-Garcia JL. Microglial TNF-alpha mediates enhancement of dopaminergic degeneration by brain angiotensin. *Glia.* 2014; 62:145-157.
58. Tang Y, Xu J, Qu W, Peng X, Xin P, Yang X, Ying C, Sun X, Hao L. Resveratrol reduces vascular cell senescence through attenuation of oxidative stress by SIRT1/NADPH oxidase-dependent mechanisms. *J Nutr Biochem.* 2012; 23:1410-1416.
59. Pfluger PT, Herranz D, Velasco-Miguel S, Serrano M, Tschöp MH. Sirt1 protects against high-fat diet-induced metabolic damage. *Proc Natl Acad Sci U S A.* 2008; 105:9793-9798.
60. Yeung F, Hoberg JE, Ramsey CS, Keller MD, Jones DR, Frye RA, Mayo MW. Modulation of NF-kappaB-dependent transcription and cell survival by the SIRT1 deacetylase. *EMBO J.* 2004; 23: 2369-2380.
61. Zarzuelo MJ, López-Sepúlveda R, Sánchez M, Romero M, Gómez-Guzmán M, Ungvary Z, Pérez-Vizcaíno F, Jiménez R, Duarte J. SIRT1 inhibits NADPH oxidase activation and protects endothelial function in the rat aorta: implications for vascular aging. *Biochem Pharmacol.* 2013; 85:1288-1296.
62. Paxinos G, Watson C. The rat brain in stereotaxic coordinates. 1986. Academic Press. New York.
63. Garrido-Gil P, Rodriguez-Pallares J, Dominguez-Mejide A, Guerra MJ, Labandeira-Garcia JL. Brain angiotensin regulates iron homeostasis in dopaminergic neurons and microglial cells. *Exp Neurol.* 2013; 250: 384-396.
64. Sinha KI, Chaudhary G, Gupta YK. Protective effect of resveratrol against oxidative stress in middle cerebral artery occlusion model of stroke in rats. *Life Sci.* 2002 Jun; 71:655-665.
65. Gao X1, Xu YX, Janakiraman N, Chapman RA, Gautam SC. Immunomodulatory activity of resveratrol: suppression of lymphocyte proliferation, development of cell-mediated cytotoxicity, and cytokine production. *Biochem Pharmacol.* 2001; 62:1299-108.
66. Lu KT, Chiou RY, Chen LG, Chen MH, Tseng WT, Hsieh HT, Yang YL. Neuroprotective effects of resveratrol on cerebral ischemia-induced neuron loss mediated by free radical scavenging and cerebral blood flow elevation. *J Agric Food Chem.* 2006; 54:3126-3131.
67. Righi M, Mori L, De Libero G, Sironi M, Biondi A, Mantovani A, Donini SD, Ricciardi-Castagnoli P. Monokine production by microglial cell clones. *Eur J Immunol.* 1989; 19: 1443-1448.
68. Crawford GD Jr, Le WD, Smith RG, Xie WJ, Stefani E, Appel SH. A novel N18TG2 x mesencephalon cell hybrid expresses properties that suggest a dopaminergic cell line of substantia nigra origin. *J Neurosci.* 1992; 12:3392-3398.
69. Solomon JM, Pasupuleti R, Xu L, McDonagh T, Curtis R, DiStefano PS, Huber LJ. Inhibition of SIRT1 catalytic activity increases p53 acetylation but does not alter cell survival following DNA damage. *Mol Cell Biol.* 2006; 26: 28-38.
70. Gertz M, Fischer F, Nguyen GT, Lakshminarasimhan M, Schutkowski M, Weyand M, Steegborn C. Ex-527 inhibits Sirtuins by exploiting their unique NAD<sup>+</sup>-dependent deacetylation mechanism. *Proc Natl Acad Sci U S A.* 2013; 110:E2772-2781.
71. Giles ME, Fernley RT, Nakamura Y, Moeller I, Aldred GP, Ferraro T, Penschow JD, McKinley MJ, and Oldfield BJ. Characterization of a specific antibody to the rat angiotensin II AT1 receptor. *J Histochem Cytochem.* 1999; 47: 507-516.
72. Obermüller N, Gentili M, Gauer S, Gretz N, Weigel M, Geiger H, Gassler N. Immunohistochemical and mRNA localization of the angiotensin II receptor subtype 2 (AT2) in follicular granulosa cells of the rat ovary. *J Histochem Cytochem.* 2004; 52, 545-548.
73. Ruiz-Ortega M, Esteban V, Suzuki Y, Ruperez M, Mezzano S, Ardiles L, Justo P, Ortiz A, Egido J. Renal expression of angiotensin type 2 (AT2) receptors during kidney damage. *Kidney Int Suppl.* 2003; 86:S21-26.
74. Sareila O, Jaakkola N, Olofsson P, Kelkka T, Holmdahl R. Identification of a region in p47phox/NCF1 crucial for phagocytic NADPH oxidase (NOX2) activation. *J Leukoc Biol.* 2013; 93:427-435.
75. Garbin U, Fratta Pasini A, Stranieri C, Cominacini M, Pasini A, Manfro S, Lugoboni F, Mozzini C, Guidi G, Faccini G, Cominacini L. Cigarette smoking blocks the protective expression of Nrf2/ARE pathway in peripheral mononuclear cells of young heavy smokers favouring inflammation. *PLoS One.* 2009; 4:e8225.
76. Chandrasekhar A, Laloraya M, Kumar PG. Modulation of nicotinamide adenine dinucleotide phosphate oxidase activity through sequential posttranslational modifications of p22 phagocytic oxidase during capacitation and acrosome reaction in goat spermatozoa. *J Anim Sci.* 2011; 89:2995-3007.
77. Rodriguez-Perez AI, Valenzuela R, Villar-Cheda B, Guerra MJ, Lanciego JL, Labandeira-Garcia JL. Estrogen and angiotensin interaction in the substantia nigra. Relevance

to postmenopausal Parkinson's disease. *Exp Neurol*. 2010; 224: 517-526.

78. Livak KJ, Schmittgen TD. Analysis of Relative Gene Expression Data Using Real-Time Quantitative PCR and the 2(-Delta Delta C(T)) Method. *Methods*. 2001; 25:402-408.
79. Pfaffl MW. A new mathematical model for relative quantification in real-time RT-PCR. *Nucleic Acids Research*. 2001; 29: e45.
